et al. that this problem does not concern pumps in general. We also agree that the new adaptor for the H-Tron V-100, which is equipped with two small holes and can be closed with a red plug, should eliminate these problems as long as the pump is used according to the manufacturer's specific instructions. We also fully support the recommendation suggested by Prendergast et al. to use the plug for the adaptor holes only when watertightness is needed (in the bath or shower) instead of removing it only when pressure problems are expected. When such instructions are followed, the H-Tron V-100 is at least an equal alternative to other pumps in the market.

KRISTIAN MIDTHJELL, MD  
HELGE KAPELRUD, MD  
ARILD BJØRNERUD, MD  
TOR CLAUDI, MD  
MARIT BJØRGAAS, MD  
JAK JERVELL, MD

From the Community Medicine Research Unit (K.M.), National Institute of Public Health, Verdal; the Department of Medicine (H.K.), Hamar Hospital, Hamar; the Department of Medicine (A.B.), Ringerike Hospital, Ringerike; the Rønvik Health Center (T.C.), Bodø, the Department of Clinical Chemistry (M.B.), Regional Hospital, Trondheim; and the Institute of Endocrinology (J.J.), Department of Medicine, National Hospital, Oslo, Norway.

Address correspondence to Kristian Midthjell, MD, Community Medicine Research Unit, National Institute of Public Health, Neptunvn. 1, N-7650 Verdal, Norway. E-mail: verdalfh@due.unit.no.

## References

1. Midthjell K, Kapelrud H, Bjørnerud A, Claudi T, Bjørngaas M, Jervell J: Severe or life-threatening hypoglycemia in insulin pump treatment. *Diabetes Care* 17:1235–1237, 1994

## Lipoprotein(a), Apolipoprotein(a) Polymorphism, and Insulin Treatment in Type II Diabetic Patients

The relation between lipoprotein(a) [Lp(a)] and insulin treatment in diabetes is still unclear. Schernthaner et al. (1) did not find significant correlation between daily insulin dosages and Lp(a) levels; Wolffenbuttel et al. (2) did not observe any changes in Lp(a) levels with insulin therapy as compared with previous treatment with oral agents. Recently, Gruden et al. (3) observed higher Lp(a) concentrations in insulin-treated than in oral agent-treated patients.

In order to investigate the relationship between Lp(a) and hypoglycemic treatment in type II diabetes, we evaluated not only Lp(a) concentration but also apolipoprotein(a) [apo(a)] polymorphism.

In the diabetic center of our clinic, we consecutively recruited 149 type II diabetic subjects without clinical or instrumental evidence of hepatopathy, nephropathy, coronary heart disease

(CHD), peripheral vascular disease, or proliferative diabetic retinopathy. None of the patients showed microalbuminuria. Out of 149 patients, 107 were treated with hypoglycemic oral drugs and 42 with insulin. These two groups were comparable (Table 1) with respect to sex, body mass index, systolic and diastolic blood pressure, and percentage of hypertension, smoking, and family history of CHD. Of course, patients on insulin treatment had a higher mean age and duration of diabetes because before the secondary failure, they were treated (for  $11.5 \pm 6.4$  years) with oral drugs. Moreover, the two groups had similar glycometabolic control.

Fasting plasma samples for Lp(a) were frozen at  $-80^{\circ}\text{C}$  until use. We used an ELISA-test [Macra-Lp(a), SDI, DE] for Lp(a) dosage and a Western Blot method for the identification of apo(a) isoforms, as previously described (4). Twenty-one apo(a) isoforms with molecular masses varying from 400 to 775 kDa were found. A conventional cut off was fixed at 640–655 kDa to split low and high molecular mass. Out of 149 subjects, we detected 0.7% “null” phenotypes [no electrophoretic bands and an Lp(a) concentration of 0 mg/dl] and 38.2% double band phenotypes.

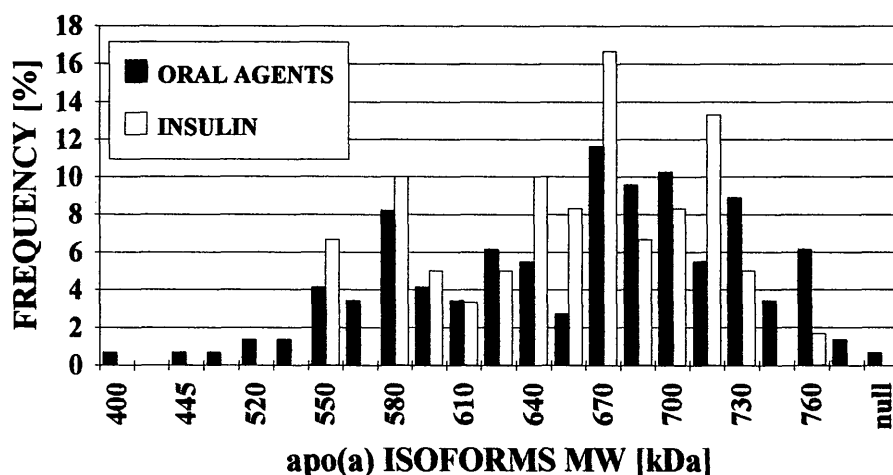

**Figure 1**—Graphic representation of apo(a) isoform distribution in type II diabetic patients treated by oral agents ( $n = 107$ ) and insulin ( $n = 42$ ). Cutoff was fixed at 640–655 kDa.

Table 1—Clinical and glyco-metabolic parameters, Lp(a) concentration, and apo(a) isoform distribution in type II diabetic patients in therapy with oral agents or insulin

|                                         | Oral agents  | Insulin      | P       |
|-----------------------------------------|--------------|--------------|---------|
| n                                       | 107          | 42           |         |
| M/F                                     | 44/63        | 18/24        | 0.85†   |
| Age (years)                             | 55.6 ± 7.1   | 62.2 ± 7.0   | 0.0001* |
| BMI (kg/m <sup>2</sup> )                | 26.1 ± 3.9   | 25.1 ± 3.1   | 0.11*   |
| sBP (mmHg)                              | 135.3 ± 17.5 | 138.8 ± 21.1 | 0.35*   |
| dBp (mmHg)                              | 82.0 ± 7.5   | 82.5 ± 7.9   | 0.76*   |
| Diabetes duration (years)               | 9.8 ± 6.5    | 14.2 ± 7.9   | 0.001*  |
| Hypertension                            | 55 (51%)     | 22 (52%)     | 0.91†   |
| Smoking                                 | 37 (34%)     | 16 (38%)     | 0.69†   |
| Family history of CHD                   | 37 (34%)     | 14 (33%)     | 0.88†   |
| Fasting glucose (mmol/l)                | 8.34 ± 1.81  | 8.59 ± 1.58  | 0.41*   |
| HbA <sub>1c</sub> (%)                   | 6.8 ± 1.4    | 7.2 ± 1.3    | 0.11*   |
| Fructosamine (μmol/dl)                  | 301.4 ± 42.1 | 304.4 ± 36.4 | 0.66*   |
| Tryglycerides (mmol/l)                  | 1.70 ± 0.72  | 1.58 ± 0.64  | 0.39†   |
| Total cholesterol (mmol/l)              | 5.49 ± 1.07  | 5.43 ± 0.97  | 0.74*   |
| HDL cholesterol (mmol/l)                | 1.29 ± 0.24  | 1.30 ± 0.29  | 0.84*   |
| LDL cholesterol (mmol/l)                | 3.46 ± 1.01  | 3.51 ± 0.76  | 0.71*   |
| Lp(a) (mg/dl)                           | 17.6 ± 19.0  | 16.2 ± 18.0  | 0.66*   |
| Low molecular mass apo(a) isoforms (%)  | 39           | 40           | 0.97†   |
| High molecular mass apo(a) isoforms (%) | 61           | 60           |         |

Data are means ± SD or n (%). \*Student's *t* test. †Mann-Whitney test. ‡ $\chi^2$  test. BMI, body mass index; sBP/dBP, systolic/diastolic blood pressure. To divide apo(a) isoforms with low and high molecular mass, a conventional cutoff was fixed at 640–655 kDa.

By the Spearman test, the classic inverse correlation between Lp(a) levels and apo(a) isoforms' molecular masses was confirmed in both patients treated by oral agents ( $r_s = -0.752$ ,  $P = 0.0001$ ) and patients treated by insulin ( $r_s = -0.745$ ,  $P = 0.013$ ).

We did not observe any significant difference in Lp(a) concentration between type II diabetic patients treated with oral agents and those treated with insulin (17.6 vs. 16.2 mg/dl). Moreover, no significant correlation was found between Lp(a) levels and daily insulin units ( $26.7 \pm 10.2$  U/day; Spearman rank test:  $r_s = 0.195$ ,  $P = 0.214$ ).

These results were confirmed by the analysis of apo(a) polymorphism: In both diabetic groups we observed a similar distribution of apo(a) isoforms, with a prevalence of high molecular masses (61 vs. 60%) (Table 1, Fig. 1).

In conclusion, Lp(a) does not seem significantly modulated by the exogenous insulin in type II diabetes, as

also confirmed by the lack of association between Lp(a) levels and daily insulin requirements. The higher Lp(a) levels found by Gruden et al. (3) in patients on insulin treatment may be due to a different distribution of apo(a) phenotypes.

PAOLA BUSCAGLIA, MD  
CARMINE GAZZARUSO, MD  
ADRIANA GARZANITI, MD  
GRAZIELLA BONETTI, MD  
PIETRO FRATINO, MD  
DIEGO GEROLDI, MD

From the Department of Internal Medicine and Medical Therapeutics (P.B., C.G., A.G., G.B., D.G.), First Medical Clinic, I.R.C.C.S. Policlinico San Matteo, and the Department of Internal Medicine and Medical Therapeutics (P.F.), Polo Universitario Città di Pavia, University of Pavia, Pavia, Italy.

Address correspondence to Diego Geroldi, MD, Clinica Medica 1 - Policlinico San Matteo, Piazzale Golgi 2, 27100 Pavia, Italy.

## References

1. Scherthaner G, Kostner GM, Dieplinger H, Prager R, Muhlhauser I: Apolipoproteins (A-I, A-II, B), Lp(a) lipoprotein and lecithin: cholesterol acyltransferase activity in Diabetes Mellitus. *Atherosclerosis* 49: 277–293, 1983
2. Wolfenbittel BH, Leurs PB, Sels JP, Rondas-Colbers GJ, Menheere PP, Nieuwenhuijzen-Kruseman AC: Improved blood glucose control by insulin therapy in type 2 diabetic patients has no effect on lipoprotein(a) levels. *Diabetic Med* 10:427–430, 1993
3. Gruden G, Velgio M, Cavallo-Perin P, Olivetti C, Mormile A, Cassader M, Pagano G: Lipoprotein(a) and insulin treatment in NIDDM patients (Letter). *Diabetes Care* 17: 1075–1076, 1994
4. Geroldi D, Bellotti V, Buscaglia P, Bonetti G, Gazzaruso C, Caprioli A, Fratino P: Characterization of apo(a) polymorphism by a modified immunoblotting technique in an Italian population sample. *Clin Chim Acta* 221:159–169, 1993
